# Supplementary material
Source: MDPI journal article supplement (https://www.mdpi.com/2673-4591/39/1/55)
Supplement: s1 [file s1]

**Table S1.** Statistic descriptive of observed and CMIP5 rainfall data projection in Trentino-Alto Adige under different RCP scenarios.

| Statistic                | AR_Observed data | AR_RCP 2.6 | AR_RCP 4.5 | AR_RCP 6.0 | AR_RCP 8.5 |
|--------------------------|------------------|------------|------------|------------|------------|
| Minimum                  | 919.11           | 1021.31    | 1039.86    | 1036.60    | 1039.86    |
| Maximum                  | 992.25           | 1061.95    | 1080.13    | 1093.64    | 1082.27    |
| 1 <sup>st</sup> Quartile | 929.50           | 1036.35    | 1049.33    | 1062.27    | 1057.74    |
| Median                   | 965.96           | 1042.55    | 1055.39    | 1080.65    | 1062.77    |
| 3 <sup>rd</sup> Quartile | 983.63           | 1053.08    | 1060.07    | 1089.79    | 1072.83    |
| Sum                      | 17247.54         | 18789.33   | 19030.34   | 19328.76   | 19140.76   |
| Mean                     | 958.20           | 1043.85    | 1057.24    | 1073.82    | 1063.38    |
| CV                       | 0.03             | 0.01       | 0.01       | 0.02       | 0.01       |
| p-value (Beta 4)         | 0.95             | 0.76       | 0.17       | 0.87       | 0.81       |
| p-value (Weibull 3)      | 0.31             | 0.96       | 0.32       | 0.67       | 0.96       |
| p-value (GEV)            | 0.31             | 0.52       | 0.75       | 0.03       | 0.87       |
| p-value (Logistics)      | 0.68             | 0.89       | 0.44       | 0.66       | 0.99       |

CV: Coefficient of Variation; AR: annual rainfall from 2005 to 2022.

**Table S2.** Performance analysis of polynomial regression model to downscale CMIP5 annual rainfall data projection using different iterations, followed by model's equation.

| Iteration       | Statistic                   | RCP 2.6<br>Downscaled                                               | RCP 4.5<br>Downscaled                                               | RCP 6.0<br>Downscaled                                               | RCP 8.5<br>Downscaled                                               |
|-----------------|-----------------------------|---------------------------------------------------------------------|---------------------------------------------------------------------|---------------------------------------------------------------------|---------------------------------------------------------------------|
| 1 <sup>st</sup> | Equation (i=2)              | $Y_1 = -112822 + 218.086 \times X - 0.10449 \times X^2$             | $Y_1 = -91933 + 176.4105 \times X - 0.08375 \times X^2$             | $Y_1 = -54305 + 104.529 \times X - 0.04940 \times X^2$              | $Y_1 = -83754 + 159.381 \times X - 0.07496 \times X^2$              |
|                 | R <sup>2</sup> <sub>1</sub> | 0.4080                                                              | 0.4033                                                              | 0.6043                                                              | 0.3901                                                              |
|                 | MSE                         | 612.0281                                                            | 510.1372                                                            | 384.9673                                                            | 745.1822                                                            |
|                 | RMSE                        | 24.7392                                                             | 22.5862                                                             | 19.6206                                                             | 27.2980                                                             |
|                 |                             |                                                                     |                                                                     |                                                                     |                                                                     |
| 2 <sup>nd</sup> | Equation (i=4)              | $Y_2 = 15190 - 30.97991 \times Y_1 + 0.01682 \times Y_1^2$          | $Y_2 = 23273 - 48.701 \times Y_1 + 0.02652 \times Y_1^2$            | -                                                                   | $Y_2 = 70725 - 148.121 \times Y_1 + 0.07859 \times Y_1^2$           |
|                 | R <sup>2</sup> <sub>2</sub> | 0.6177                                                              | 0.6939                                                              | 0.5227 (R <sup>2</sup> <sub>2</sub> < R <sup>2</sup> <sub>1</sub> ) | 0.5828                                                              |
|                 | MSE                         | 413.3067                                                            | 332.9044                                                            | 477.9663                                                            | 480.1817                                                            |
|                 | RMSE                        | 19.7650                                                             | 18.2457                                                             | 22.4414                                                             | 23.0870                                                             |
|                 |                             |                                                                     |                                                                     |                                                                     |                                                                     |
| 3 <sup>rd</sup> | Equation (i=6)              | -                                                                   | -                                                                   | -                                                                   | -                                                                   |
|                 | R <sup>2</sup> <sub>3</sub> | 0.4777 (R <sup>2</sup> <sub>3</sub> < R <sup>2</sup> <sub>2</sub> ) | 0.5543 (R <sup>2</sup> <sub>3</sub> < R <sup>2</sup> <sub>2</sub> ) | -                                                                   | 0.3409 (R <sup>2</sup> <sub>3</sub> < R <sup>2</sup> <sub>2</sub> ) |
|                 | MSE                         | 583.3067                                                            | 412.6660                                                            | -                                                                   | 591.4928                                                            |
|                 | RMSE                        | 21.7650                                                             | 20.3142                                                             | -                                                                   | 24.3206                                                             |

R<sup>2</sup>: coefficient of determination; MSE: mean square error; RMSE: root mean square error; X: projected data; Y: Downscaled data; -: no data.
